# Supplementary material for: The long-term dynamics of serum antibodies against SARS-CoV-2
Source: PeerJ. 2022 Dec 15;10:e14547. doi: 10.7717/peerj.14547 (PMC9760025; doi:10.7717/peerj.14547)
Supplement: Supplemental Information 1 [file peerj-10-14547-s001.xlsx]

## Sheet: raw data
Symptoms/Swab (days)	Mean (E+RdRP) norm RNAse P	Blood/Swab (Month)	Age	Mean CT	IgG	IgM	IgA	IgE	OD/cut-off value igG	OD/cut-off value IgM	OD/cut-off value IgA	OD/cut-off value IgE	Gender
4	6.71448	1	38	0.92288	0.567	0.444	1.2	0.103	0.825328	1.27954	1.7192	0.485849	M
4	9.14814	1	38	0.628384	1.604	0.517	1.4	0.115	2.33479	1.48991	2.00573	0.542453	W
6	7.88077	1	45	0.781441	2.513	1.157	1.9	0.393	3.65793	3.33429	2.72206	1.85377	M
8	9.41791	1	72	0.694783	2.405	1.388	2.2	0.218	3.50073	4	3.15186	1.0283	M
7	6.3594	1	70	0.960851	2.996	0.896	1.5	0.176	4.36099	2.58213	2.149	0.830189	W
5	8.00353	1	59	0.747123	2.313	0.698	1.6	0.157	3.36681	2.01153	2.29226	0.740566	M
8	4.46201	1	22	1.22762	1.93	0.403	1.6	0.155	2.80932	1.16138	2.29226	0.731132	W
4	7.64908	1	38	0.794595	1.949	0.561	0.4	0.142	2.83697	1.61671	0.573066	0.669811	W
10	4.21518	1	24	1.2625	2.577	0.626	1.6	0.137	3.75109	1.80403	2.29226	0.646226	W
8	5.63073	1	17	1.0524	2.344	0.603	1.5	0.133	3.41194	1.73775	2.149	0.627358	W
6	8.65955	1	67	0.72767	2.21	0.675	1.2	0.208	3.21689	1.94524	1.7192	0.981132	M
2	3.73606	1	60	1.30943	2.277	0.653	2.3	0.187	3.31441	1.88184	3.29513	0.882075	W
5	5.59633	1	66	1.07077	2.406	0.597	1.9	0.174	3.50218	1.72046	2.72206	0.820755	W
2	9.6012	1	65	0.663994	2.516	0.965	1.8	0.171	3.6623	2.78098	2.5788	0.806604	W
2	6.22402	1	74	0.939739	2.379	0.644	1.4	0.162	3.46288	1.85591	2.00573	0.764151	M
4	9.10393	1	42	0.658077	2.113	0.426	1.3	0.153	3.07569	1.22767	1.86246	0.721698	M
1	6.48609	1	46	1.06349	2.073	0.37	1	0.126	3.01747	1.06628	1.43266	0.59434	W
5	8.19042	1	34	0.796101	2.661	1.453	1.7	0.208	3.87336	4.18732	2.43553	0.981132	W
8	7.28531	1	19	0.853627	2.807	0.489	0.6	0.196	4.08588	1.40922	0.859599	0.924528	W
4	10.8625	1	89	0.982605	2.504	1.048	2.1	0.189	3.64483	3.02017	3.0086	0.891509	W
10	5.79194	1	46	1.19541	2.001	0.298	1.6	0.161	2.91266	0.85879	2.29226	0.759434	W
10	6.56611	1	26	1.00234	2.189	0.473	0.7	0.146	3.18632	1.36311	1.00287	0.688679	W
9	6.64685	1	50	1.00568	2.066	0.519	1	0.134	3.00728	1.49568	1.43266	0.632075	W
4	9.84381	1	50	0.613773	2.368	0.426	1.4	0.133	3.44687	1.22767	2.00573	0.627358	M
7	5.60724	1	24	1.04576	2.147	0.409	0.9	0.182	3.12518	1.17867	1.2894	0.858491	M
6	6.94692	1	45	1.00077	2.395	0.706	1.4	0.151	3.48617	2.03458	2.00573	0.712264	W
7	6.79619	1	34	1.20471	2.313	0.542	0.8	0.15	3.36681	1.56196	1.14613	0.707547	W
8	5.87663	1	56	1.14795	2.556	0.55	1.2	0.146	3.72052	1.58501	1.7192	0.688679	W
6	7.82562	1	60	0.719111	2.855	0.83	2.3	0.243	4.15575	2.39193	3.29513	1.14623	W
7	3.86972	1	42	1.38312	2.201	0.731	1.7	0.143	3.20378	2.10663	2.43553	0.674528	W
7	7.73314	1	22	0.90636	2.443	0.493	1.5	0.133	3.55604	1.42075	2.149	0.627358	M
12	8.75219	1	52	0.779029	2.244	0.393	0.6	0.13	3.26638	1.13256	0.859599	0.613208	M
8	7.99117	1	40	0.890869	2.871	1.044	2.2	0.184	4.17904	3.00865	3.15186	0.867925	M
7	5.74868	1	35	1.06156	2.606	0.426	0.8	0.129	3.7933	1.22767	1.14613	0.608491	W
		2	33	1.17639	3.21	1.056	1.1	0.167	4.67249	3.04323	1.57593	0.787736	M
		2	50	0.959382	2.659	0.965	1.3	0.204	3.87045	2.78098	1.86246	0.962264	M
		2	24	1.34095	2.434	0.861	1.2	0.127	3.54294	2.48127	1.7192	0.599057	W
		2	23	0.946979	2.006	0.314	0.7	0.124	2.91994	0.904899	1.00287	0.584906	M
		2	24	0.731338	1.338	0.315	0.8	0.132	1.9476	0.907781	1.14613	0.622642	W
		2	28	1.00213	1.973	0.489	0.5	0.116	2.87191	1.40922	0.716332	0.54717	W
		2	26	1.01244	2.077	0.376	0.6	0.111	3.02329	1.08357	0.859599	0.523585	M
		2	35	1.26097	3.044	0.635	1	0.134	4.43086	1.82997	1.43266	0.632075	M
		2	26	0.992144	2.141	0.236	0.6	0.129	3.11645	0.680115	0.859599	0.608491	M
		2	35	0.886747	2.022	0.243	0.6	0.118	2.94323	0.700288	0.859599	0.556604	W
		2	32	1.39337	1.72	0.448	0.2	0.11	2.50364	1.29107	0.286533	0.518868	W
		2	32	1.08524	2.104	0.164	0.3	0.109	3.06259	0.472622	0.429799	0.514151	M
		2	36	0.902417	2.425	0.338	0.4	0.129	3.52984	0.974063	0.573066	0.608491	W
		2	36	1.13839	1.694	0.285	1.2	0.119	2.46579	0.821326	1.7192	0.561321	M
		2	31	0.7652	2.509	0.337	0.6	0.103	3.65211	0.971182	0.859599	0.485849	W
		2	38	0.628384	2.446	0.406	0.9	0.122	3.56041	1.17003	1.2894	0.575472	W
		2	34	1.25433	2.364	0.647	1.1	0.131	3.44105	1.86455	1.57593	0.617925	W
		3	38	1.00508	2.697	0.867	0.9	0.149	3.92576	2.49856	1.2894	0.70283	W
		3	48	1.04732	3.118	0.529	1.9	0.164	4.53857	1.5245	2.72206	0.773585	W
		3	32	0.887635	1.999	0.591	0.2	0.122	2.90975	1.70317	0.286533	0.575472	W
		3	40	1.04638	1.722	0.12	0.4	0.121	2.50655	0.345821	0.573066	0.570755	W
		3	40	1.10732	2.03	0.256	0.3	0.12	2.95488	0.737752	0.429799	0.566038	W
		3	44	1.09281	2.735	0.539	0.4	0.113	3.98108	1.55331	0.573066	0.533019	W
		3	41	0.928118	1.999	0.279	0.3	0.105	2.90975	0.804035	0.429799	0.495283	M
		3	32	1.54149	1.947	0.383	0.7	0.108	2.83406	1.10375	1.00287	0.509434	W
		3	37	0.937016	2.614	0.562	1.6	0.12	3.80495	1.6196	2.29226	0.566038	W
		3	34	0.851136	2.223	0.27	0.3	0.109	3.23581	0.778098	0.429799	0.514151	W
		3	28	0.914145	2.311	0.554	0.8	0.173	3.3639	1.59654	1.14613	0.816038	M
		3	34	0.729405	2.541	0.916	1.5	0.148	3.69869	2.63977	2.149	0.698113	M
		3	33	0.86502	1.829	0.176	0.4	0.153	2.6623	0.507205	0.573066	0.721698	W
		3	30	1.00197	1.512	0.564	0.7	0.129	2.20087	1.62536	1.00287	0.608491	W
		3	25	1.00417	1.582	0.361	0.4	0.192	2.30277	1.04035	0.573066	0.90566	M
		3	37	0.91766	1.72	0.27	0.4	0.127	2.50364	0.778098	0.573066	0.599057	M
		3	60	1.06591	1.575	0.223	0.2	0.109	2.29258	0.642651	0.286533	0.514151	W
		3	33	1.04702	2.718	0.677	0.7	0.137	3.95633	1.95101	1.00287	0.646226	W
		3	44	0.944299	1.895	1.041	1.1	0.133	2.75837	3	1.57593	0.627358	W
		3	35	1.04451	2.395	0.29	0.6	0.133	3.48617	0.835735	0.859599	0.627358	M
		3	43	0.909304	1.782	0.442	0.5	0.117	2.59389	1.27378	0.716332	0.551887	M
		3	30	0.7918	2.211	0.252	0.5	0.109	3.21834	0.726225	0.716332	0.514151	W
		3	32	0.80155	2.234	0.341	0.3	0.142	3.25182	0.982709	0.429799	0.669811	W
		3	36	1.27736	1.501	0.163	0.3	0.138	2.18486	0.469741	0.429799	0.650943	W
		3	33	0.977733	1.628	0.178	0.3	0.122	2.36972	0.512968	0.429799	0.575472	W
		3	48	0.846584	1.504	0.247	0.9	0.115	2.18923	0.711816	1.2894	0.542453	W
		3	35	0.74698	2.694	0.4	0.6	0.144	3.9214	1.15274	0.859599	0.679245	M
		3	37	0.923945	1.87	0.856	0.3	0.132	2.72198	2.46686	0.429799	0.622642	W
		3	75	1.12825	2.39	0.528	0.9	0.128	3.47889	1.52161	1.2894	0.603774	M
		3	44	1.23239	2.282	0.635	0.4	0.121	3.32169	1.82997	0.573066	0.570755	M
		3	39	0.778857	3.088	0.31	0.4	0.117	4.49491	0.893372	0.573066	0.551887	M
		3	45	0.773225	2.085	0.275	0.7	0.113	3.03493	0.792507	1.00287	0.533019	W
		3	61	1.11459	2.268	0.48	1.2	0.107	3.30131	1.38329	1.7192	0.504717	W
		3	32	1.06491	2.219	0.225	0.4	0.103	3.22999	0.648415	0.573066	0.485849	M
		3	37	0.918542	2.226	0.592	0.5	0.168	3.24017	1.70605	0.716332	0.792453	M
		3	54	0.751916	2.306	0.415	1.4	0.145	3.35662	1.19597	2.00573	0.683962	W
		3	32	1.00183	1.58	0.15	0.3	0.125	2.29985	0.432277	0.429799	0.589623	W
		3	39	0.600166	2.337	0.374	0.7	0.293	3.40175	1.07781	1.00287	1.38208	W
		3	42	0.632132	2.499	0.432	1.4	0.143	3.63755	1.24496	2.00573	0.674528	M
		3	48	0.760511	2.116	0.466	0.5	0.122	3.08006	1.34294	0.716332	0.575472	W
		3	41	0.803537	1.336	0.159	0.8	0.108	1.94469	0.458213	1.14613	0.509434	M
		3	52	0.826044	1.865	0.375	0.7	0.108	2.7147	1.08069	1.00287	0.509434	W
		3	29	1.06905	2.729	0.901	1.7	0.163	3.97234	2.59654	2.43553	0.768868	W
		3	30	1.20566	1.666	0.445	0.2	0.153	2.42504	1.28242	0.286533	0.721698	M
		3	58	0.717683	2.945	0.296	1.1	0.164	4.28675	0.853026	1.57593	0.773585	W
		4	43	1.02835	2.052	0.502	1.1	0.109	2.9869	1.44669	1.57593	0.514151	M
		4	49	0.800718	2.524	0.245	0.9	0.137	3.67394	0.706052	1.2894	0.646226	W
		4	34	1.09661	2.513	0.131	0.5	0.155	3.65793	0.377522	0.716332	0.731132	M
		4	44	0.780765	1.644	0.322	0.4	0.113	2.39301	0.927954	0.573066	0.533019	M
		4	62	0.942658	1.929	0.176	1.8	0.194	2.80786	0.507205	2.5788	0.915094	W
		4	60	0.845868	1.977	0.533	1.4	0.156	2.87773	1.53602	2.00573	0.735849	M
		4	42	0.927021	2.405	0.459	0.8	0.155	3.50073	1.32277	1.14613	0.731132	M
		4	49	0.784792	2.546	0.277	1.3	0.147	3.70597	0.798271	1.86246	0.693396	W
		4	51	0.852551	2.294	0.273	0.3	0.125	3.33916	0.786744	0.429799	0.589623	W
		4	45	0.702508	1.582	0.185	0.3	0.107	2.30277	0.533141	0.429799	0.504717	W
		4	42	0.972911	1.829	0.869	1.2	0.173	2.6623	2.50432	1.7192	0.816038	M
		4	37	0.876361	2.459	0.318	1.2	0.169	3.57933	0.916427	1.7192	0.79717	W
		4	37	1.01315	1.638	0.226	0.4	0.136	2.38428	0.651297	0.573066	0.641509	W
		4	56	0.958163	2.374	0.445	0.8	0.133	3.4556	1.28242	1.14613	0.627358	W
		4	59	0.955398	2.283	0.296	0.4	0.111	3.32314	0.853026	0.573066	0.523585	W
		4	31	0.972204	2.293	0.556	1	0.139	3.3377	1.60231	1.43266	0.65566	M
		4	39	0.921838	1.876	0.191	0.5	0.125	2.73071	0.550432	0.716332	0.589623	W
		4	53	0.944656	1.518	0.171	0.4	0.124	2.20961	0.492795	0.573066	0.584906	W
		4	24	1.10589	1.809	0.247	0.4	0.127	2.63319	0.711816	0.573066	0.599057	W
		4	66	1.29925	1.673	0.3	0.6	0.178	2.43523	0.864553	0.859599	0.839623	M
		4	36	0.884498	1.598	0.266	0.6	0.125	2.32606	0.766571	0.859599	0.589623	W
		4	49	0.775742	2.013	0.231	0.4	0.12	2.93013	0.665706	0.573066	0.566038	W
		5	51	0.94841	2.797	0.737	0.7	0.15	4.07132	2.12392	1.00287	0.707547	W
		5	44	0.872101	2.45	0.235	0.8	0.124	3.56623	0.677233	1.14613	0.584906	M
		5	42	1.24871	2.577	0.354	0.5	0.152	3.75109	1.02017	0.716332	0.716981	W
		5	49	0.814477	1.263	0.21	0.4	0.115	1.83843	0.605187	0.573066	0.542453	M
		5	40	0.645931	1.929	0.238	0.2	0.134	2.80786	0.685879	0.286533	0.632075	W
		5	20	0.968371	1.915	0.107	0.4	0.128	2.78748	0.308357	0.573066	0.603774	M
		5	22	0.886478	1.898	0.203	0.7	0.176	2.76274	0.585014	1.00287	0.830189	M
		5	44	0.881542	1.334	0.113	0.8	0.126	1.94178	0.325648	1.14613	0.59434	W
		5	23	0.871347	1.424	0.186	0.2	0.111	2.07278	0.536023	0.286533	0.523585	M
		5	44	1.01295	1.358	0.22	0.7	0.115	1.97671	0.634006	1.00287	0.542453	W
		5	70	0.649814	1.991	0.129	0.7	0.109	2.89811	0.371758	1.00287	0.514151	M
		5	32	1.42417	1.41	0.145	0.4	0.126	2.0524	0.417867	0.573066	0.59434	W
		5	35	1.00746	1.426	0.254	0.2	0.11	2.07569	0.731988	0.286533	0.518868	W
		5	49	0.775742	2.013	0.231	0.4	0.12	2.93013	0.665706	0.573066	0.566038	W
		5	63	0.879547	1.848	0.227	1	0.139	2.68996	0.654179	1.43266	0.65566	M
		5	45	0.666454	0.873	0.184	0.2	0.103	1.27074	0.530259	0.286533	0.485849	M
		6	22	0.88945	0.908	0.255	0.2	0.111	1.32169	0.73487	0.286533	0.523585	M
		6	42	0.935945	1.636	0.156	0.8	0.11	2.38137	0.449568	1.14613	0.518868	W
		6	34	0.897011	1.802	0.166	0.6	0.148	2.623	0.478386	0.859599	0.698113	W
		6	44	0.85502	1.285	0.201	1.2	0.119	1.87045	0.579251	1.7192	0.561321	W
		6	55	0.669059	1.319	0.187	0.4	0.1	1.91994	0.538905	0.573066	0.471698	M
		6	39	0.905562	1.331	0.151	0.5	0.112	1.93741	0.435159	0.716332	0.528302	M
		6	80	0.933333	1.981	0.145	0.4	0.136	2.88355	0.417867	0.573066	0.641509	M
		6	48	0.859649	1.8	0.286	1.3	0.132	2.62009	0.824207	1.86246	0.622642	W
		6	59	1.12824	2.45	0.346	1.5	0.145	3.56623	0.997118	2.149	0.683962	M
		6	34	1.09295	0.611	0.146	0.2	0.11	0.889374	0.420749	0.286533	0.518868	W
		6	54	1.28246	1.267	0.343	0.2	0.105	1.84425	0.988473	0.286533	0.495283	W
		6	36	0.784216	1.428	0.212	0.6	0.138	2.0786	0.610951	0.859599	0.650943	W
		6	38	0.784261	0.847	0.134	0.4	0.13	1.2329	0.386167	0.573066	0.613208	W
		6	40	0.844489	1.434	0.146	0.3	0.126	2.08734	0.420749	0.429799	0.59434	M
		6	24	0.935912	1.632	0.221	0.6	0.128	2.37555	0.636888	0.859599	0.603774	W
		6	30	0.883539	1.148	0.141	0.3	0.117	1.67103	0.40634	0.429799	0.551887	W
		6	53	0.987199	2.148	0.171	1.3	0.168	3.12664	0.492795	1.86246	0.792453	M
		6	44	0.791306	1.877	0.203	0.9	0.123	2.73217	0.585014	1.2894	0.580189	W
		6	32	1.21163	1.683	0.205	0.6	0.122	2.44978	0.590778	0.859599	0.575472	W
		6	56	1.07216	2.031	0.321	0.5	0.122	2.95633	0.925072	0.716332	0.575472	M
		6	40	0.952666	2.368	0.34	1	0.137	3.44687	0.979827	1.43266	0.646226	M
		6	43	0.806025	1.662	0.132	0.5	0.119	2.41921	0.380403	0.716332	0.561321	W
		6	39	0.647535	1.312	0.137	0.3	0.116	1.90975	0.394813	0.429799	0.54717	M
		6	62	1.15374	1.83	0.163	0.8	0.157	2.66376	0.469741	1.14613	0.740566	W
		6	57	1.04066	2.487	0.319	1	0.137	3.62009	0.919308	1.43266	0.646226	M
		6	43	0.971063	1.156	0.149	0.7	0.107	1.68268	0.429395	1.00287	0.504717	W
		6	40	0.773504	1.938	0.184	1.2	0.132	2.82096	0.530259	1.7192	0.622642	M
		6	54	0.674342	2.279	0.143	0.5	0.124	3.31732	0.412104	0.716332	0.584906	W
		6	57	0.856734	1.981	0.225	0.6	0.134	2.88355	0.648415	0.859599	0.632075	W
		6	39	0.61806	2.697	0.296	1.2	0.12	3.92576	0.853026	1.7192	0.566038	M
		6	43	0.847063	1.224	0.474	0.4	0.119	1.78166	1.36599	0.573066	0.561321	M
		6	57	0.724448	0.11	0.783	0.1	0.118	0.160116	2.25648	0.143266	0.556604	M
		6	31	1.63617	1.235	0.123	0.4	0.153	1.79767	0.354467	0.573066	0.721698	M
		6	17	0.873548	2.531	0.292	0.8	0.138	3.68413	0.841499	1.14613	0.650943	M
		6	44	0.892648	2.482	0.253	2.6	0.134	3.61281	0.729107	3.72493	0.632075	W
		6	55	0.765026	2.181	0.313	0.8	0.116	3.17467	0.902017	1.14613	0.54717	M
		6	37	1.10003	1.374	0.137	0.8	0.153	2	0.394813	1.14613	0.721698	W
		6	32	1.50303	1.609	0.136	0.6	0.143	2.34207	0.391931	0.859599	0.674528	M
		6	43	1.00017	2.486	0.136	0.9	0.141	3.61863	0.391931	1.2894	0.665094	M
		6	36	1.15102	1.719	0.18	0.9	0.13	2.50218	0.518732	1.2894	0.613208	W
		6	47	0.737351	2.253	0.424	0.9	0.127	3.27948	1.2219	1.2894	0.599057	W
		6	31	1.2373	1.381	0.159	0.6	0.119	2.01019	0.458213	0.859599	0.561321	M
		6	39	0.803249	1.022	0.148	0.4	0.117	1.48763	0.426513	0.573066	0.551887	W
		6	29	1.09694	1.317	0.198	0.3	0.115	1.91703	0.570605	0.429799	0.542453	M
		6	45	0.949812	1.184	0.144	0.9	0.114	1.72344	0.414986	1.2894	0.537736	M
		6	55	0.733015	0.703	0.164	0.4	0.113	1.02329	0.472622	0.573066	0.533019	M
		6	28	1.33406	1.18	0.154	0.3	0.204	1.71761	0.443804	0.429799	0.962264	M
		6	40	1.26874	0.972	0.106	1.3	0.185	1.41485	0.305476	1.86246	0.872642	M
		6	59	0.925188	1.858	0.311	1.5	0.162	2.70451	0.896254	2.149	0.764151	M
		6	51	0.922822	1.938	0.188	0.6	0.133	2.82096	0.541787	0.859599	0.627358	W
		6	54	0.96177	1.929	0.176	1.2	0.14	2.80786	0.507205	1.7192	0.660377	W
		6	62	0.926744	2.066	0.193	0.5	0.139	3.00728	0.556196	0.716332	0.65566	W
		6	39	1.07668	1.547	0.38	0.5	0.117	2.25182	1.0951	0.716332	0.551887	M
		6	54	0.799739	1.238	0.148	0.3	0.111	1.80204	0.426513	0.429799	0.523585	M
		6	42	0.860222	1.602	0.232	0.4	0.156	2.33188	0.668588	0.573066	0.735849	W
		6	35	1.1246	1.588	0.172	0.8	0.155	2.3115	0.495677	1.14613	0.731132	W
		6	42	1.03396	1.715	0.37	0.6	0.115	2.49636	1.06628	0.859599	0.542453	M
		6	36	1.10931	0.206	0.134	0.2	0.113	0.299854	0.386167	0.286533	0.533019	M
		6	61	1.07204	1.772	0.113	0.6	0.142	2.57933	0.325648	0.859599	0.669811	M
		6	56	1.08992	1.961	0.203	0.6	0.142	2.85444	0.585014	0.859599	0.669811	W
		6	21	0.950332	1.994	0.265	0.7	0.133	2.90247	0.763689	1.00287	0.627358	M
		6	51	0.996379	1.799	0.113	1.4	0.138	2.61863	0.325648	2.00573	0.650943	M
		6	63	0.842561	1.632	0.337	0.6	0.125	2.37555	0.971182	0.859599	0.589623	M
		6	34	1.04784	1.254	0.269	0.7	0.15	1.82533	0.775216	1.00287	0.707547	W
		6	39	0.781449	1.075	0.203	0.4	0.113	1.56477	0.585014	0.573066	0.533019	W
		6	87	1.04438	2.909	0.446	0.8	0.169	4.23435	1.2853	1.14613	0.79717	W
		6	35	0.75163	1.478	0.472	0.8	0.112	2.15138	1.36023	1.14613	0.528302	W
		6	61	0.702641	2.158	0.139	0.7	0.137	3.14119	0.400576	1.00287	0.646226	W
		6	67	1.09837	1.953	0.248	1.4	0.152	2.84279	0.714697	2.00573	0.716981	M
		6	47	0.779947	1.745	0.179	0.9	0.111	2.54003	0.51585	1.2894	0.523585	M
		6	24	0.824226	1.299	0.371	0.4	0.11	1.89083	1.06916	0.573066	0.518868	W
		6	50	1.17172	1.334	0.218	0.9	0.13	1.94178	0.628242	1.2894	0.613208	W
		7	64	1.0663	2.086	0.288	1.2	0.138	3.03639	0.829971	1.7192	0.650943	M
		7	54	1.08185	1.835	0.125	1.2	0.133	2.67103	0.360231	1.7192	0.627358	W
		7	55	1.05503	1.783	0.185	1	0.131	2.59534	0.533141	1.43266	0.617925	W
		7	25	0.94049	2.113	0.312	0.5	0.159	3.07569	0.899135	0.716332	0.75	W
		7	42	1.03396	1.796	0.303	0.5	0.143	2.61426	0.873199	0.716332	0.674528	M
		7	62	1.15374	2.123	0.16	0.6	0.148	3.09025	0.461095	0.859599	0.698113	W
		7	42	0.935945	2.552	0.315	1.1	0.134	3.7147	0.907781	1.57593	0.632075	W
		7	44	0.85502	1.513	0.402	1.2	0.134	2.20233	1.1585	1.7192	0.632075	W
		7	55	0.669059	1.775	0.292	0.2	0.121	2.5837	0.841499	0.286533	0.570755	M
		7	38	0.902405	2.677	0.15	0.5	0.254	3.89665	0.432277	0.716332	1.19811	W
		7	57	0.752805	2.877	0.442	0.9	0.148	4.18777	1.27378	1.2894	0.698113	M
		7	56	1.08992	2.647	0.552	0.5	0.135	3.85298	1.59078	0.716332	0.636792	M
		7	39	0.781449	1.591	0.409	0.7	0.233	2.31587	1.17867	1.00287	1.09906	W
		7	62	0.926744	2.378	0.136	0.4	0.148	3.46143	0.391931	0.573066	0.698113	W
		7	54	0.96177	2.256	0.18	0.1	0.13	3.28384	0.518732	0.143266	0.613208	W
		7	61	0.702641	2.245	0.353	0.7	0.148	3.26783	1.01729	1.00287	0.698113	W
		7	54	0.799739	1.545	0.134	0.2	0.137	2.24891	0.386167	0.286533	0.646226	M
		7	50	1.00017	2.183	0.346	0.9	0.134	3.17758	0.997118	1.2894	0.632075	W
		7	47	0.779947	0.998	0.352	1	0.11	1.45269	1.01441	1.43266	0.518868	M
		7	23	0.871347	1.861	0.248	0.2	0.107	2.70888	0.714697	0.286533	0.504717	M
		7	63	0.842561	1.724	0.323	0.6	0.13	2.50946	0.930836	0.859599	0.613208	M
		7	67	1.09837	2.214	0.322	1	0.2	3.22271	0.927954	1.43266	0.943396	M
		7	61	0.702641	2.158	0.139	0.4	0.113	3.14119	0.400576	0.573066	0.533019	W
		7	54	0.806777	1.615	0.128	1.8	0.124	2.3508	0.368876	2.5788	0.584906	W
		7	43	1.00017	2.675	0.15	1.1	0.125	3.89374	0.432277	1.57593	0.589623	M
